# Supplementary material for: Simple and covalent fabrication of a paper device and its application in sensitive chemiluminescence immunoassay
Source: Royal Society of Chemistry journal article supplement (doi:10.1039/c2an35266d), 2012-01-01
Supplement: c2an35266d.pdf [file c2an35266d.pdf]

## **Simple and Covalent Fabrication of Paper Device and Its Application in Sensitive Chemiluminescence Immunoassay**

Shoumei Wang<sup>a</sup>, Lei Ge<sup>a</sup>, Xianrang Song<sup>b</sup>, Mei Yan<sup>a</sup>, Shenguang Ge<sup>a</sup>,  
Jinghua Yu<sup>\*a</sup>, Fang Zeng<sup>a</sup>

<sup>a</sup>Key Laboratory of Chemical Sensing & Analysis in Universities of Shandong,  
School of Chemistry and Chemical Engineering, University of Jinan, Jinan 250022,  
P.R. China;

<sup>b</sup>Cancer Research Center, Shandong Tumor Hospital, Jinan 250117, P.R. China

\*Corresponding author: Jinghua Yu

E-mail: [ujn.yujh@gmail.com](mailto:ujn.yujh@gmail.com)

Telephone: +86-531-82767161

Fax number: +86-531-82765969

## Supplemental Information

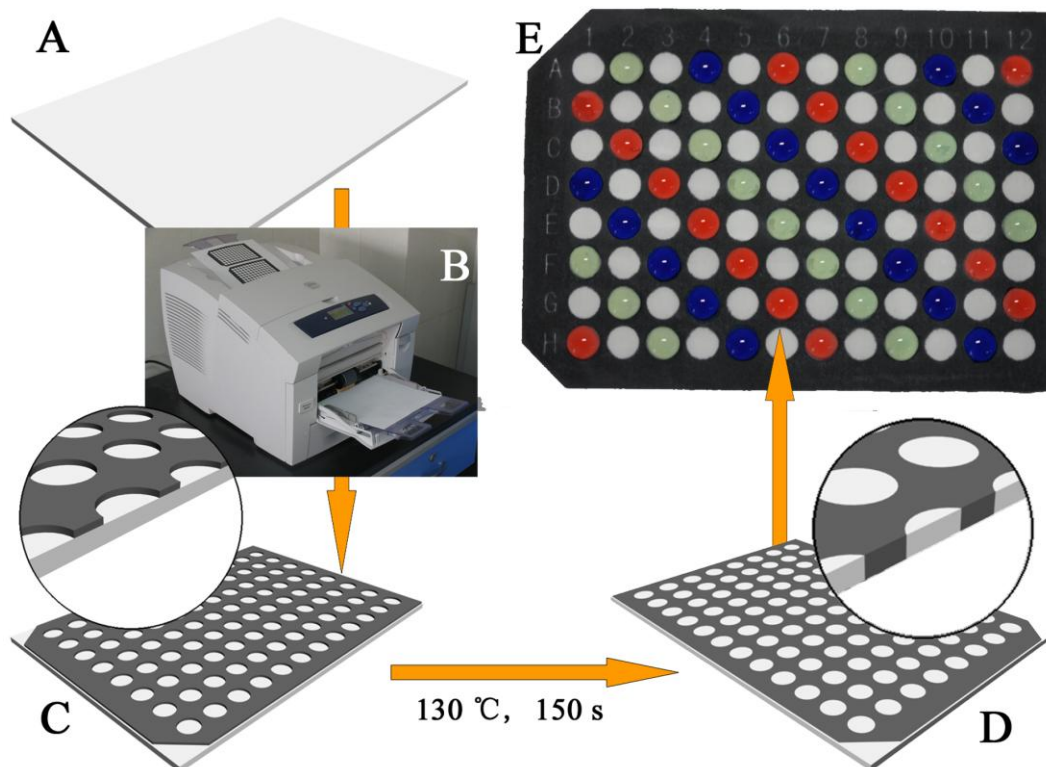

Scheme S1. The schematic representation of process to fabricate paper microzone plate by wax printing: (A) original paper; (B) printing device; (C) wax printed paper; (D) wax penetrated paper; (E) Image showing the water-control ability of the paper microzone plate.

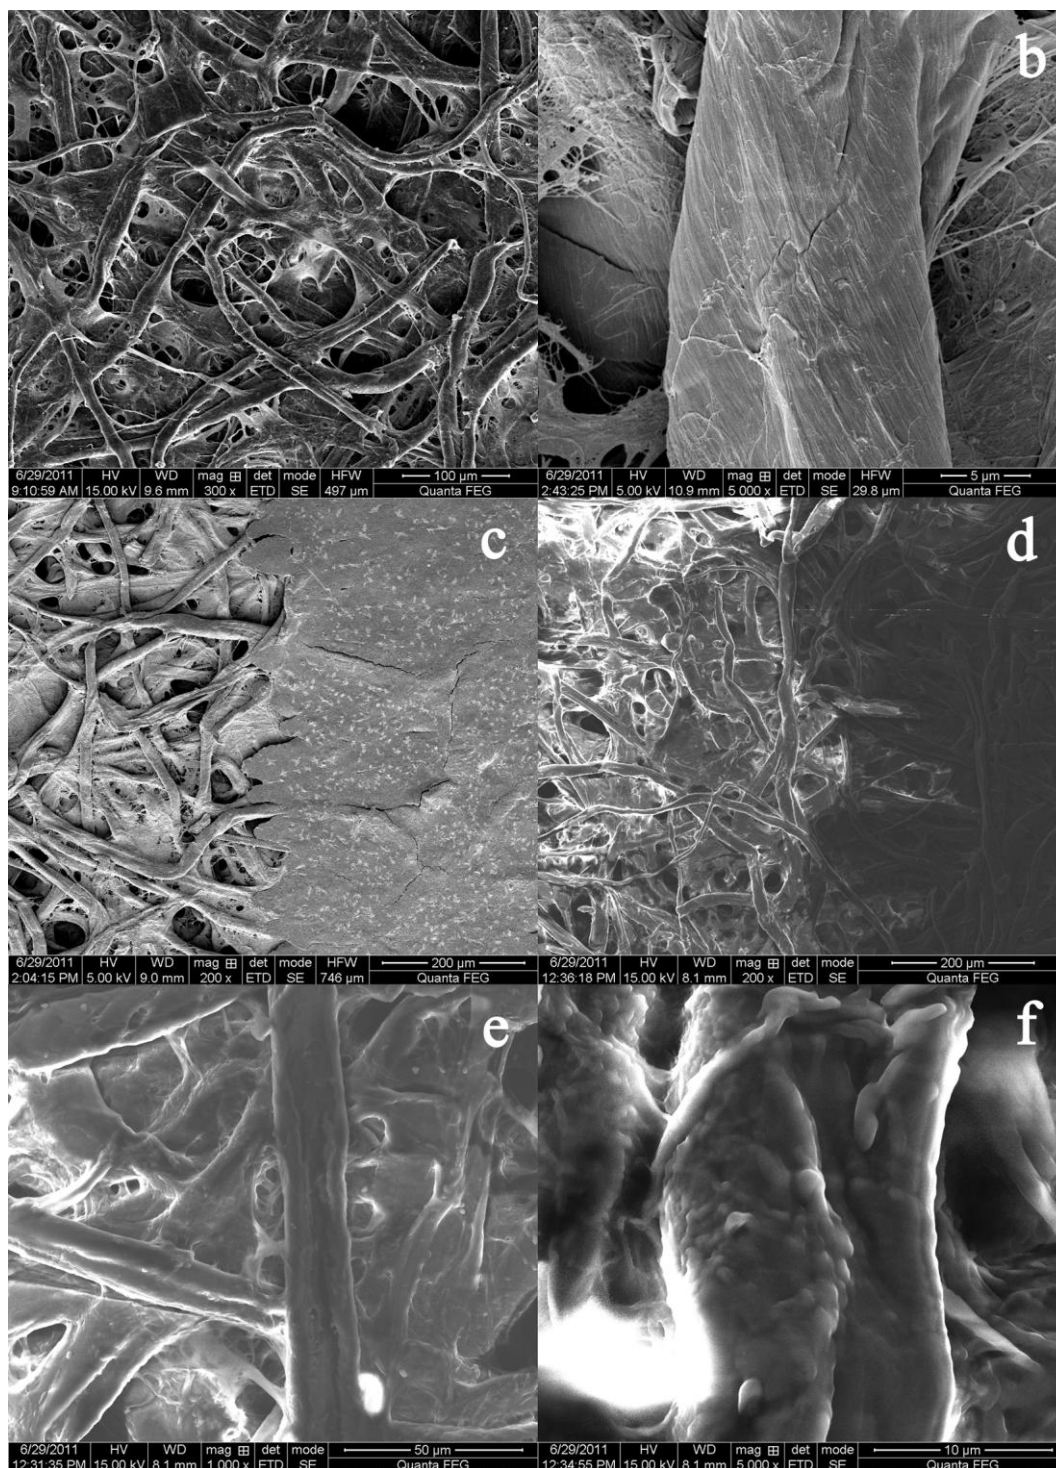

Figure S1. The SEM images of the paper-based microzone plate. (a, b) the porous structures and microfibrils of paper zone; (c) wax-printed paper; (d) wax-penetrated paper; (e) the porous structures of wax-penetrated paper; (f) the microfibrils of wax-penetrated paper.

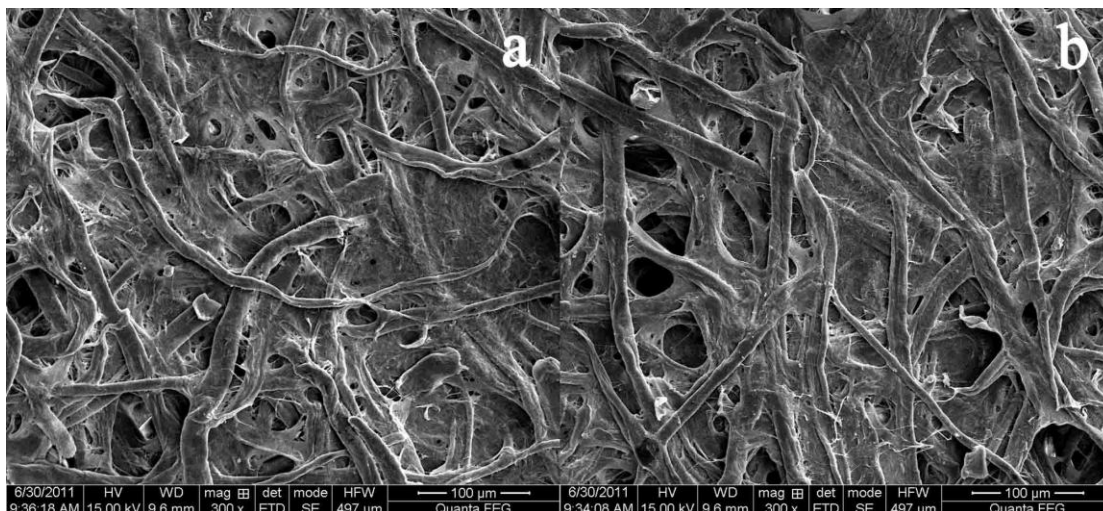

Figure S2. The SEM images of periodate oxidized paper (a) and antibodies immobilized paper (b)

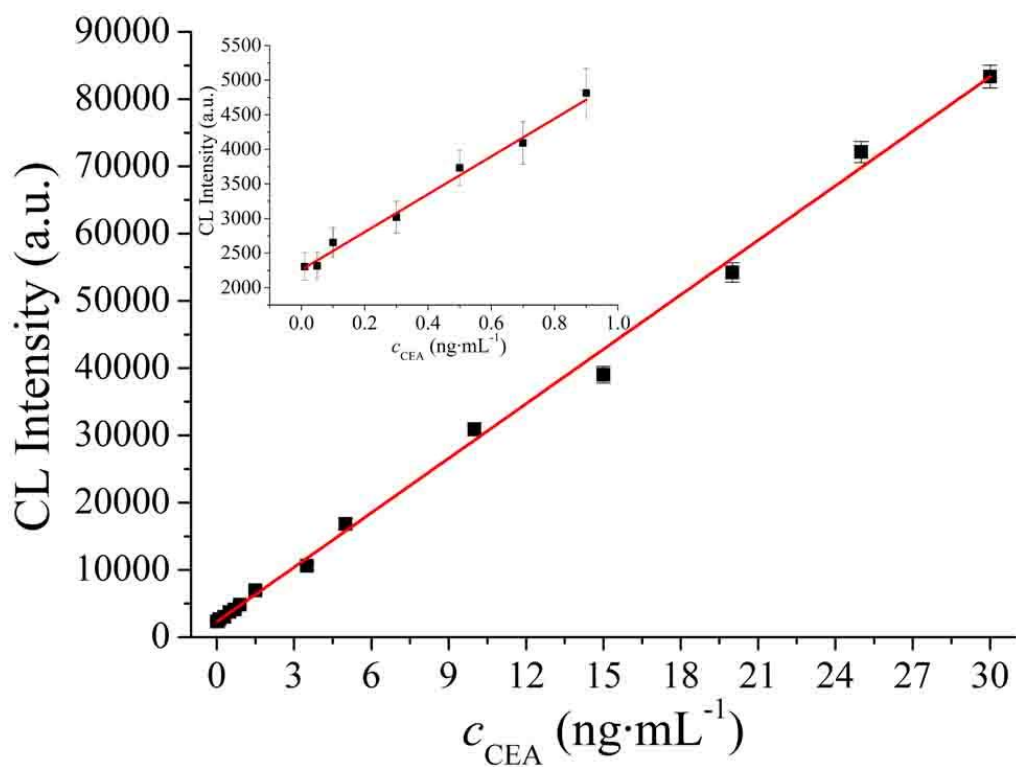

Figure S3. The calibration curve for the determination of CEA through paper-based CLIA on paper immunoplate using AuNPs conjugated HRP-labeled CEA antibodies as reporter under the optimal conditions. Inset was the amplification of the linear range from 0.01 to 1.0 ng·mL<sup>-1</sup> for CEA determination.
